# **1 Guanine content of microRNAs is associated with their tumor suppressive and 2 oncogenic roles in lung and breast cancers**

3 Amit Cohen<sup>1</sup>, Mario Alberto Burgos-Aceves<sup>2,\*</sup>, Yoav Smith<sup>1</sup>

4 <sup>1</sup>Genomic Data Analysis Unit, The Hebrew University of Jerusalem-Hadassah  
5 Medical School, P.O. Box 12272, Jerusalem 91120, Israel.

6 <sup>2</sup>Department of Chemistry and Biology, University of Salerno, via Giovanni Paolo II,  
7 132, 84084 Fisciano, SA, Italy.

8 \*Correspondence to:

9 Mario Alberto Burgo-Aceves, Laboratory of Biological Chemistry, Department of  
10 Chemistry and Biology, University of Salerno, via Giovanni Paolo II, 132, 84084  
11 Fisciano, SA, Italy. Tel.: +39 089969379 E-mail: [mburgosaceves@unisa.it](mailto:mburgosaceves@unisa.it). ORCID  
12 <https://orcid.org/0000-0001-5558-278X>

## **13 Running Head**

14 Precursor microRNA's guanine content in lung and breast cancers.

## **15 Contributions**

16 (1) Conception and design: AC

17 (2) Administrative support: MAB-A

18 (3) Provision of study materials or patients: AC, MAB-A

19 (4) Collection and assembly of data: All authors

20 (5) Data analysis and interpretation: AC, YS

21 (6) Manuscript writing: All authors

22 (7) Final approval of manuscript: All authors.

## 23    **Abstract**

24    **Background:** microRNAs (miRNAs, miRs) are small noncoding RNAs that  
 25    negatively regulate gene expression at the post-transcriptional level and fine-tune  
 26    gene functions. A global repression in miRNAs expression in different types of  
 27    human tumors, after exposure to cigarette-smoke, or to the hormone estrogen, was  
 28    shown to be associated with guanine (G) enrichment in the terminal loops (TLs) of  
 29    their precursors.

30    **Methods:** we integrated the G content of miRNA mature forms and precursor  
 31    miRNA terminal loops with their described function in the literature, as indicated by  
 32    PubMed database. Gene Ontology term analysis described the pathways in which the  
 33    G enriched miRNA targets are involved.

34    **Results:** we show here an association between the relative G enrichment of precursor  
 35    miRNAs TLs and their tendency to act as tumor suppressive miRs in human lung and  
 36    breast cancers. Another association was observed between the high G content of the  
 37    miRNAs 5-mature forms and their tendency to act as oncomiRs.

38    **Conclusions:** the results support previous findings suggesting that the G sequence  
 39    content is an important feature determining miRNAs expression and function, and  
 40    open the way for future cancer investigations in this direction.

41    **Keywords:** Guanine, microRNA, Lung cancer, Breast cancer, Tumor suppressor,  
 42    Oncogene.

## 43    **Background**

44 MicroRNAs (miRNAs) are endogenous ~22-nucleotides RNA molecules, that  
 45 negatively regulate gene expression at the post-transcriptional level and are  
 46 implicated in the pathogenesis of many human diseases, including cancer, where they  
 47 can act as tumor suppressive miRNAs (tumor suppressive miRs) or as oncogenic  
 48 miRNAs (oncomiRs) [1, 2]. Generally, oncomiRs are overexpressed in cancers while  
 49 tumor suppressive miRs are underexpressed, however, a comprehensive reduction in  
 50 miRNA was commonly observed in human cancers, where miRNAs showed lower  
 51 expression levels in tumors and cancer cell lines compared with normal tissues [3-6].  
 52 In addition, a widespread repression of miRNA expression has also been reported  
 53 after exposure to cigarette-smoke (CS) [7-9], treatment with the hormone estrogen  
 54 [10-12], and c-Myc activation [13]. These aforementioned alterations in miRNA  
 55 expression can occur as a result of affecting the transcription of miRNA genes [13],  
 56 miRNA export from the nucleus [14], or at any stage of the miRNA maturation  
 57 process by modulation of key regulators or components of the miRNA biogenesis  
 58 pathway, including Drosha and Dicer [15].

59 Findings suggest that the miRNA terminal loop (TL) is an important platform for  
 60 different RNA-binding proteins (RBPs) that act as activators or repressors of Drosha  
 61 and Dicer processing, and selectivity regulate miRNAs by binding to guanine (G)-  
 62 enriched motifs in the RNA TLs of their precursors [16]. It was shown that miRNAs  
 63 with the tetra-nucleotide sequence motif GGAG in their TLs were regulated through  
 64 binding of the RBP Lin28, which interferes with Dicer processing [17], and that the  
 65 sequence AGGGU in the TL mediates regulation of miRNA biogenesis by the KH-  
 66 type splicing regulatory protein (KSRP) RBP [18]. It was recently shown that  
 67 modification of KSRP resulted in the downregulation of a subset of TL-G-rich  
 68 miRNAs and promoted tumorigenesis [19].

69 Izzotti and Pulliero showed in their study that the G content of the TLs of  
70 miRNAs, which are involved in stress response, is higher than the G content of the  
71 other miRNAs [20]. We have recently found, using bioinformatic data analysis of  
72 zebrafish, mouse, and human breast cancer cell line, an association between the  
73 widespread miRNAs reduction that is observed after estrogen (17 $\beta$ -estradiol; E2)  
74 exposure and a high TL-G content in their precursors [21]. In addition, we also  
75 showed that similar G enrichment exists in TLs of downregulated miRNAs found in  
76 different human cancers [22]. Here, we bioinformatically analyzed the sequences of  
77 over 250 human miRNAs, and show the association between miRNAs G-content and  
78 their known function as tumor suppressors and oncogenes in lung and breast cancers.

## 79 **Materials and Methods**

### 80 *Literature-data mining.*

81 Literature searches were performed in the PubMed literature database for original  
82 articles written in the English language focusing on miRNAs and lung or breast  
83 cancers. The searches included a specific miRNA term paired with the key words;  
84 ‘lung cancer’ or ‘breast cancer’. No restriction was set for the publication date. Only  
85 articles showing a role for miRNAs, by using functional studies, were selected. Where  
86 applicable, the direct target genes of the investigated miRNAs were retrieved from the  
87 above articles.

### 88 *Bioinformatic tools.*

89 All miRNA precursor sequences were obtained from the Sanger Institute miRBase  
90 database version 21 (<http://microrna.sanger.ac.uk/sequences/>). DAVID v6 functional  
91 annotation tool was used to identify enriched GO terms of genes.

### 92 *Nucleotide composition analysis.*

93 Calculation of nucleotide composition in miRNA precursors was determined using  
 94 the compseq algorithm (<http://emboss.bioinformatics.nl/cgi-bin/emboss/compseq>).  
 95 Input sequences included precursor miRNAs (pre-miRNAs) stem-loops (SLs), TLs, 5-  
 96 and 3-mature miRNAs of the tumor suppressive miRs and oncomiRs (miRNA lists  
 97 and their sequences are presented in Supplementary Table 1).

# 98 *Statistical data analysis.*

99 A one-way ANOVA, post-hoc Tukey HSD Test was performed for comparison  
 100 between G enrichment in SLs, TLs, and mature miRNAs of the tumor suppressive  
 101 miRs and oncomiRs. Statistical analysis was performed using the software XLSTAT  
 102 (Addinsoft Inc., Paris, France).

## 103 **Results**

104 Since miRNAs downregulation in cancer is associated with the relative G enrichment  
 105 of their TL sequences [22], we asked whether there is also a relation between the  
 106 relative G content of miRNAs and their known function in cancer. For this purpose,  
 107 255 human pre-miRNA sequences were retrieved from the miRBase database and  
 108 used for further analysis. Each sequence was divided into its different structural  
 109 constituents; the TL and the two mature miRNAs (5-mature and 3-mature forms). The  
 110 complete list of miRNA sequences is presented in Supplementary Table 1. For each  
 111 of these miRNAs the complete pre-miRNA, the TL, and the 5 and 3-mature miRNA  
 112 sequences were analyzed for evaluation of nucleotide composition (Supplementary  
 113 Table 1). Next, we filtered the miRNA list and selected those with relatively high G  
 114 content (more than 35%) or low G content (less than 15%) in their TL and 5-mature  
 115 sequences, and for the resulted 105 miRNAs, we searched for known functions in  
 116 lung and breast cancers, by mining publicly available data in the PubMed database.

117 The search resulted in 420 articles; 109 studied on oncomiRs and 311 on tumor  
118 suppressive miRs.

119 The results show that when presenting the number of the articles respectively to  
120 the G percentage of miRNAs TLs, tumor suppressive miRs are found to be more G-  
121 enriched in their TLs, while oncomiRs show the opposite trend (Figure 1A). When  
122 presenting the number of the articles respectively to the G percentage of 5-mature  
123 miRNAs, the oncomiRs appear to be more G-enriched in their 5-mature forms (Figure  
124 1B). From this list, we selected only those miRNAs that showed a tendency to act as  
125 either tumor suppressive miRs or oncomiRs, in both lung and breast cancers. A list of  
126 84 miRNAs was obtained and sub-grouped into oncomiRs (25 miRNAs) and tumor  
127 suppressive miRs (59 miRNAs) (Supplementary Table 2).

128 The results show that the TLs of the tumor suppressive miRs group are more  
129 enriched in G (1.33 fold) than the group of oncomiRs (Figure 2). No such enrichment  
130 was observed when the same analysis was conducted with the complete pre-miRNA  
131 SL sequences, or with the 5 and 3-mature miRNAs (Figure 2). Moreover, this  
132 enrichment is even more prominent when analyzing the dual G (GG) content, where  
133 the TLs of the tumor suppressive miRs group are more enriched in GG (2.1 fold) than  
134 the group of oncomiRs (Figure 2). Also here, no such enrichment was observed when  
135 the same analysis was conducted with the complete SLs, despite this time the GG  
136 content of the 3-mature miRNAs was also slightly enriched (1.32 fold). Also in the  
137 case of triple G (GGG), only the TLs of the tumor suppressive miRs group are more  
138 enriched in G (1.34 fold) than the group of oncomiRs (Figure 2). Interestingly, the G  
139 content of the 5-mature miRNAs has shown the opposite trend than the TLs, and was  
140 slightly enriched in oncomiRs relative to tumor suppressive miRs (0.87 fold) (Figure  
141 2), and this trend of enrichment in the 5-mature forms was even more pronounced

when looking at the GG (0.65 fold) and GGG (0.39 fold) content (Figure 2). Statistical analysis revealed a significant difference between TLs and 5-mature miRNAs G, GG and GGG content of the tumor suppressive miRs relative to oncomiRs (one-way ANOVA,  $P=0.01$ ). Together, the above results show an association between high TLs and 5-mature miRNAs G content and their tendency to act either as tumor suppressive miRs or oncomiRs, respectively.

In order to define the function of those tumor suppressive miRs, which have relatively high G content in their TLs, we selected the 30 most TL-G-enriched miRNAs, (over 35% G), retrieved their identified direct target genes from the PubMed articles (Supplementary Table 2), and searched for biological processes enrichment. Functional annotation was performed using the DAVID tool, and among Gene Ontology (GO) biological processes; negative regulation of cell death, regulation of signal transduction, and positive regulation of cell migration, were the most significant ones in lung and breast cancers (Figure 3). The results show that a large number of target genes of these tumor suppressive miRs are known proto-oncogenes (MYC, MYCN, EGFR, ERBB2, ERBB3, ERBB4, AKT1, CCND1, KRAS, SRC, BCL2, PIK3CA, MET, AXL, PDGFRB, JAK2, HMGA2, MYB, AGR2, PRKCA, PIM1, RAF1, RHOA, MKL1, SALL4) (Supplementary Table 3). In several cases, these oncogenes were common targets to multiple miRNAs, such as in KRAS (miR-30c, -143, -193a, -200c, let-7a), CCND1 (miR-34b, -145a, -195, let-7e), and EGFR (miR-34a, -143, -218) (Supplementary Table 3).

## Discussion

Over the past two decades, it has become increasingly apparent that loss- or gain-of-function of specific miRNAs contributes to cellular transformation and tumorigenesis [23]. OncomiRs typically function to promote cell growth, inhibit apoptosis and

control the cell cycle, while tumor suppressive miRs function to inhibit cell growth and induce apoptosis [24], and there are several examples in which a specific miRNA can act either as a tumor suppressor or an oncomiR, depending on cellular context and type of cancer [25]. However, a global miRNA downregulation in cancer was also observed, and therefore, understanding the mechanisms driving miRNA downregulation is important in uncovering the regulatory role of miRNAs in cancer biology [26].

The results presented here support previous studies showing the potential importance of TL-G content to the regulation of miRNAs expression and function [19-22]. We have previously suggested that estrogens metabolites inside the lungs, as a result of CS exposure, can potentially cause the observed widespread downregulation of miRNA expression, and contribute to lung tumor development [27, 28]. Estrogen metabolism generates highly reactive metabolites, mostly catechol estrogen-3,4-quinones, which form carcinogen depurinating G adducts [29]. Moreover, oxidative metabolites of estrogens can cause oxidative damage to G, because of its lowest oxidation potential, by forming 8-oxo-dG (8-Oxo-2'-deoxyguanosine), which eventually leads to carcinogenesis [30]. Repressed miRNAs in lung and breast cancers were shown to be the most enriched in TLs G [22], and the relation of estrogen to the development of these types of cancer is well documented [27, 30, 31]. Furthermore, like in the current study, also in the aforementioned studies, dual GG enrichment in miRNA TLs was even more pronounced [20-22]. Remarkably, experimental studies have shown that sequences with repeated G bases (GG or GGG) show higher reactivity toward oxidation than isolated G bases [32].

Despite analyzing during this study relatively small fraction (~14%) of the total number of currently identified human miRNAs, our results indicate that the number of



192 tumor suppressive miRs is greater than oncomiRs. This is in agreement with the  
 193 finding that many of the known mutated genes are oncogenes [33], and with the  
 194 general consideration of miRNAs as safeguards of the genome [24]. Of note, a  
 195 remarkable redundancy was observed between the target oncogenes of the tumor  
 196 suppressive miRs (e.g. KRAS). Synergetic effects of functionally related tumor  
 197 suppressive miRs, that share common targets and control similar processes, were  
 198 shown before [34].

199 As indicated above, tumor suppressive miRs tended to be more G-enriched in  
 200 their TLs. G enrichment in tumor suppressive miRs TLs could affect binding of RBPs  
 201 such as Lin28, KSRP, and the heteronuclear ribonucleoprotein A1 (hnRNP A1),  
 202 which compete with KSRP for their common G-rich target sequence [35]. Notably,  
 203 hnRNPA2B1, another splicing factor, binds exosomal miRNAs through the  
 204 recognition of G-enriched motifs to control their loading into exosomes [36]; small  
 205 membranous vesicles which enable genetic exchange between cells, can transfer  
 206 functional miRNAs to recipient cells and consequently downregulate the expression  
 207 of their target genes [37]. It is noteworthy that sumoylation modification controls the  
 208 binding of both KSRP and hnRNPA2B1 to miRNAs [19, 36].

209 OncomiRs, on the contrary, have lower G content in their TLs, and are relatively  
 210 more G-enriched in their 5-mature miRNA forms. The differences in G enrichment  
 211 shown here between the 5 and 3-mature miRNAs might be attributed to the  
 212 differences between the functional guide strand and the passenger strand of mature  
 213 miRNAs, as one of the characteristics of human miRNA guide strands is excess of  
 214 purines [38]. This observation could also be related to the process of sorting miRNAs  
 215 into the exosomes, as it was shown that G-rich sequence is a dominant feature of  
 216 exosome-dominant miRNAs, suggesting the possibility that RBP-mediated

translocation of cellular miRNAs into exosome cargos occurs by G-recognition [39].  
Indeed, oncogenic exosomal miRNAs (miR-17, -21, -106a, -155, -191) were highly  
induced in lung cancer [40, 41], and chemoresistance of breast cancer cells was  
recently shown to occur through the G-enriched miR-155 oncomiR exosomes  
delivery [42].

## Conclusions

Taken together, the current and previously published results suggest that G content of  
miRNAs is an important feature determining their expression and function. MiRNA  
TL-G enrichment may have important role in the carcinogenic process by affecting  
the observed global downregulation of tumor suppressive miRs, which cause  
induction of their target oncogenes, and commit cells towards carcinogenesis. On the  
other hand, high G content in the oncomiRs 5-mature sequences may function in  
guide-strand selection and miRNA targeting into the exosomes. Elucidating the  
molecular mechanisms that involve miRNAs G can have major implications for  
cancer research, therapy and prevention [43, 44].

## Acknowledgements

None

## Funding

This research did not receive any specific grant from funding agencies in the public,  
commercial, or not-for-profit sectors.

## Competing interest

The authors declare no conflict of interest.

## References

- 240 1. Bartel DP. MicroRNAs: target recognition and regulatory functions. *Cell*.  
241 2009;116:215-233.
- 242 2. Giza DE, Vasilescu C, Calin GA. () Key principles of miRNA involvement in  
243 human diseases. *Discoveries (Craiova)*. 2014;2:e34.
- 244 3. Lu J, Getz G, Miska EA, Alvarez-Saavedra E, Lamb J, Peck D, et al.  
245 MicroRNA expression profiles classify human cancers. *Nature*.  
246 2005;435:834-838.
- 247 4. Ozen M, Creighton CJ, Ozdemir M, Ittmann M. Widespread deregulation of  
248 microRNA expression in human prostate cancer. *Oncogene*. 2008;**27**:1788-  
249 1793.
- 250 5. Dvinge H, Git A, Gräf S, Curtis C, Sottoriva A, Zhao Y, et al. The shaping and  
251 functional consequences of the microRNA landscape in breast cancer. *Nature*.  
252 2013;**497**:378-382.
- 253 6. Cohen A, Burgos-Aceves MA, Smith Y. Estrogen repression of microRNA as  
254 a potential cause of cancer. *Biomed Pharmacother*. 2016;**78**:234-238.
- 255 7. Izzotti A, Calin GA, Arrigo P, Steele VE, Croce CM, De Flora S. ()  
256 Downregulation of microRNA expression in the lungs of rats exposed to  
257 cigarette smoke. *FASEB J*. 2009;**23**:806-812.
- 258 8. Schembri F, Sridhar S, Perdomo C, Gustafson AM, Zhang X, Ergun A, et al. ()  
259 MicroRNAs as modulators of smoking-induced gene expression changes in  
260 human airway epithelium. *Proc Natl Acad Sci U S A*. 2009;**106**:2319-2324.
- 261 9. Graff JW, Powers LS, Dickson AM, Kim J, Reisetter AC, Hassan IH, et al.  
262 Cigarette smoking decreases global microRNA expression in human alveolar  
263 macrophages. *PLoS One*. 2012;**7**:e44066. doi: 10.1371/journal.pone.0044066.

- 264 10. Maillot G, Lacroix-Triki M, Pierredon S, Gratadou L, Schmidt S, Bénès V, et  
265 al. Widespread estrogen-dependent repression of microRNAs involved in  
266 breast tumor cell growth. *Cancer Res.* 2009;**69**:8332-8340.
- 267 11. Yamagata K, Fujiyama S, Ito S, Ueda T, Murata T, Naitou M, et al.  
268 Maturation of microRNA is hormonally regulated by a nuclear receptor. *Mol*  
269 *Cell.* 2009;36:340-347.
- 270 12. Cohen A, Smith Y. Estrogen regulation of microRNAs, target genes, and  
271 microRNA expression associated with vitellogenesis in the zebrafish  
272 Zebrafish. 2014;11:462-748.
- 273 13. Chang TC, Yu D, Lee YS, Wentzel EA, Arking DE, West KM, et al.  
274 Widespread microRNA repression by Myc contributes to tumorigenesis. *Nat*  
275 *Genet.* 2008;40:43-50.
- 276 14. Sun HL, Cui R, Zhou J, Teng KY, Hsiao YH, Nakanishi K, et al. ERK  
277 Activation Globally Downregulates miRNAs through Phosphorylating  
278 Exportin-5. *Cancer Cell* 2016;30:723-736.
- 279 15. Lin S, Gregory RI. MicroRNA biogenesis pathways in cancer. *Nat Rev*  
280 *Cancer.* 2015;15:321-333.
- 281 16. Libri V, Miesen P, van Rij RP, Buck AH. Regulation of microRNA biogenesis  
282 and turnover by animals and their viruses. *Cell Mol Life Sci.* 2013;70:3525-  
283 3544.
- 284 17. Heo I, Joo C, Kim YK, Ha M, Yoon MJ, Cho J, et al. TUT4 in concert with  
285 Lin28 suppresses microRNA biogenesis through pre-microRNA uridylation.  
286 *Cell.* 2009;138:696-708.

- 287 18. Trabucchi M, Briata P, Garcia-Mayoral M, Haase AD, Filipowicz W, Ramos  
288 A, Gherzi R, et al. The RNA-binding protein KSRP promotes the biogenesis  
289 of a subset of microRNAs. *Nature* 2009;459:1010-1014.
- 290 19. Yuan H, Deng R, Zhao X, Chen R, Hou G, Zhang H, et al. SUMO1  
291 modification of KHSRP regulates tumorigenesis by preventing the TL-G-  
292 Rich miRNA biogenesis. *Mol Cancer* 2017;16:157.
- 293 20. Izzotti A, Pulliero A. The effects of environmental chemical carcinogens on  
294 the microRNA machinery. *Int J Hyg Environ Health*. 2014;217:601-627.
- 295 21. Cohen A, Burgos-Aceves MA, Kahan T, Smith Y. Estrogen repression of  
296 microRNAs is associated with high guanine content in the terminal loop  
297 sequences of their precursors. *Biomedicines* 2017;5:3.
- 298 22. Cohen A, Burgos-Aceves MA, Smith Y. microRNAs downregulation in  
299 cancer is associated with guanine enrichment in the terminal loop sequences  
300 of their precursors. *MicroRNA* 2018;7:1-8.
- 301 23. Kent OA, Mendell JT. () A small piece in the cancer puzzle: microRNAs as  
302 tumor suppressors and oncogenes. *Oncogene*. 2006;25:6188-6196.
- 303 24. Wang D, Qiu C, Zhang H, Wang J, Cui Q, Yin Y. Human microRNA  
304 oncogenes and tumor suppressors show significantly different biological  
305 patterns: from functions to targets. *PLoS One*. 2010;5(9):e13067. doi:  
306 10.1371/journal.pone.0013067.
- 307 25. Svoronos AA, Engelman DM, Slack FJ. OncomiR or tumor suppressor? The  
308 duplicity of microRNAs in cancer *Cancer Res*. 2016;76:3666-3670.
- 309 26. Williams M, Cheng YY, Blenkiron C, Reid G. Exploring mechanisms of  
310 microRNA downregulation in cancer. *MicroRNA*. 2017;6:2-16.

- 311 27. Cohen A, Burgos-Aceves MA, Smith Y. A potential role for estrogen in  
312 cigarette smoke-induced microRNA alterations and lung cancer. *Transl Lung*  
313 *Cancer Res* 2016;5:322-330.
- 314 28. Cohen A, Burgos-Aceves MA, Smith Y. Global microRNA downregulation:  
315 all roads lead to estrogen. *J Xiangya Med.* 2017;2:59.
- 316 29. Cavalieri EL, Rogan EG. Depurinating estrogen-DNA adducts, generators of  
317 cancer initiation: their minimization leads to cancer prevention. *Clin Transl*  
318 *Med.* 2016;5:12.
- 319 30. Słowikowski BK, Lianeri M, Jagodziński PP. Exploring estrogenic activity in  
320 lung cancer. *Mol Biol Rep.* 2017;44:35-50.
- 321 31. Yager JD, Davidson NE. Estrogen carcinogenesis in breast cancer. *N Engl J*  
322 *Med.* 2006;354:270-282.
- 323 32. Senthilkumar K, Grozema FC, Guerra CF, Bickelhaupt FM, Siebbeles LD.  
324 Mapping the sites for selective oxidation of guanines in DNA. *J Am Chem*  
325 *Soc.* 2003;125:13658-13659.
- 326 33. Cui Q, Ma Y, Jaramillo M, Bari H, Awan A, Yang S, et al. A map of human  
327 cancer signaling. *Mol Syst Biol.* 2007;3:152.
- 328 34. Bandi N, Vassella E. miR-34a and miR-15a/16 are co-regulated in non-small  
329 cell lung cancer and control cell cycle progression in a synergistic and Rb-  
330 dependent manner. *Mol Cancer.* 2011;10:55.
- 331 35. Michlewski G, Cáceres JF. Antagonistic role of hnRNP A1 and KSRP in the  
332 regulation of let-7a biogenesis. *Nat Struct Mol Biol.* 2010;17:1011-1018.
- 333 36. Villarroya-Beltri C, Gutiérrez-Vázquez C, Sánchez-Cabo F, Pérez-Hernández  
334 D, Vázquez J, Martín-Cofreces N, et al. Sumoylated hnRNPA2B1 controls

335 the sorting of miRNAs into exosomes through binding to specific motifs. Nat  
336 Commun. 2013;4:2980.

337 37. Valadi H, Ekström K, Bossios A, Sjöstrand M, Lee JJ, Lötvall JO. Exosome-  
338 mediated transfer of mRNAs and microRNAs is a novel mechanism of  
339 genetic exchange between cells. Nat Cell Biol. 2007;9:654-659.

340 38. Meijer HA, Smith EM, Bushell M. Regulation of miRNA strand selection:  
341 follow the leader? Biochem Soc Trans. 2014;42:1135-1140.

342 39. Momose F, Seo N, Akahori Y, Sawada S, Harada N, Ogura T, et al. Guanine-  
343 Rich sequences are a dominant feature of exosomal microRNAs across the  
344 mammalian species and cell types. PLoS One. 2016;11(4):e0154134. doi:  
345 10.1371/journal.pone.0154134.

346 40. Rabinowits G, Gerçel-Taylor C, Day JM, Taylor DD, Kloecker GH. Exosomal  
347 microRNA: a diagnostic marker for lung cancer. Clin Lung Cancer.  
348 2009;10:42-46.

349 41. Thind A, Wilson C. Exosomal miRNAs as cancer biomarkers and therapeutic  
350 targets. J Extracell Vesicles. 2016;5:31292.

351 42. Santos JC, Lima NDS, Sarian LO, Matheu A, Ribeiro ML, Derchain SFM.  
352 Exosome-mediated breast cancer chemoresistance via miR-155 transfer. Sci  
353 Rep. 2018;8:829.

354 43. Cohen A, Burgos-Aceves MA, Smith Y. Guanine content of precursor  
355 microRNA's terminal loop and its association with cancer. J Xiangya Med.  
356 2018;3:33.

357 44. Cohen A, Burgos-Aceves MA, Smith Y. Guanine residues of precursor  
358 microRNA's terminal loop as a potential target for cancer therapy and  
359 prevention. *Submitted for publication.*

## 360 **Supplementary Material**

361 **Supplementary Table 1:** SLs, TLs, 5 and 3-mature miRNA sequences, and their  
362 G enrichment. Shown are 255 miRNA sequences retrieved from the miRBase  
363 database. G enrichment of sequences represents the ratio of G number relative to  
364 total nucleotide number.

365 **Supplementary Table 2:** Tumor suppressive miRs, oncomiRs, and the references  
366 from PubMed Database describing their function in lung and breast cancers.  
367 When search in PubMed had no results it appears as unknown function.

368 **Supplementary Table 3:** G-enriched tumor suppressive miRs target genes.  
369 Shown are 30 most TL-G-enriched tumor suppressive miRs and their direct target  
370 genes in lung and breast cancers, as were described in the references from  
371 PubMed Database (Supplementary Table 2).

## 372 **Figure legends**

373 **Figure 1.** Number of PubMed articles describing the function of tumor  
374 suppressive miRs and oncomiRs relative to (a). TL G enrichment. (b). 5-mature G  
375 enrichment.

376 **Figure 2.** G enrichment of tumor suppressive miRs relative to oncomiRs. Single,  
377 dual and triple G were calculated in SLs, TLs, 5 and 3-mature miRNAs involved  
378 in lung and breast cancers.

379 **Figure 3.** Enriched GO terms of the target genes of G-enriched tumor suppressive  
380 miRs. Shown are significant  $-\log_2$  Benjamini p-values of the biological process



381 terms (level 5) of the 30 most TL-G-enriched tumor suppressive miRs target  
382 genes, as were identified using the DAVID functional annotation tool.

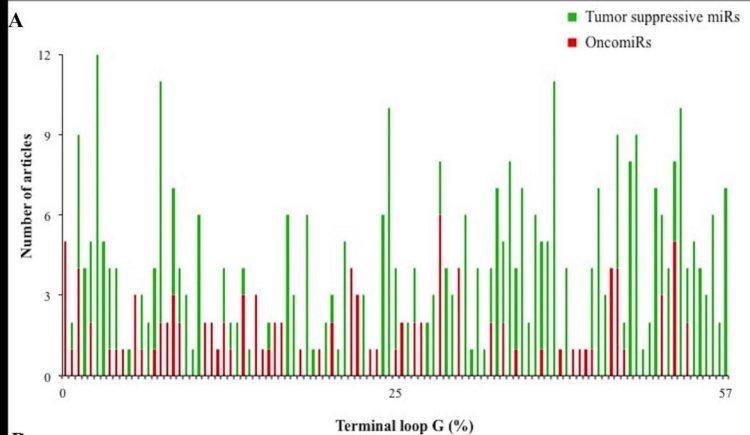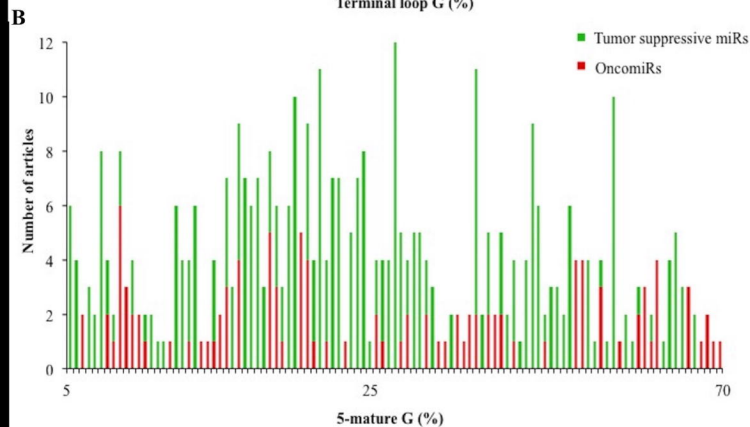



# Guanine enrichment

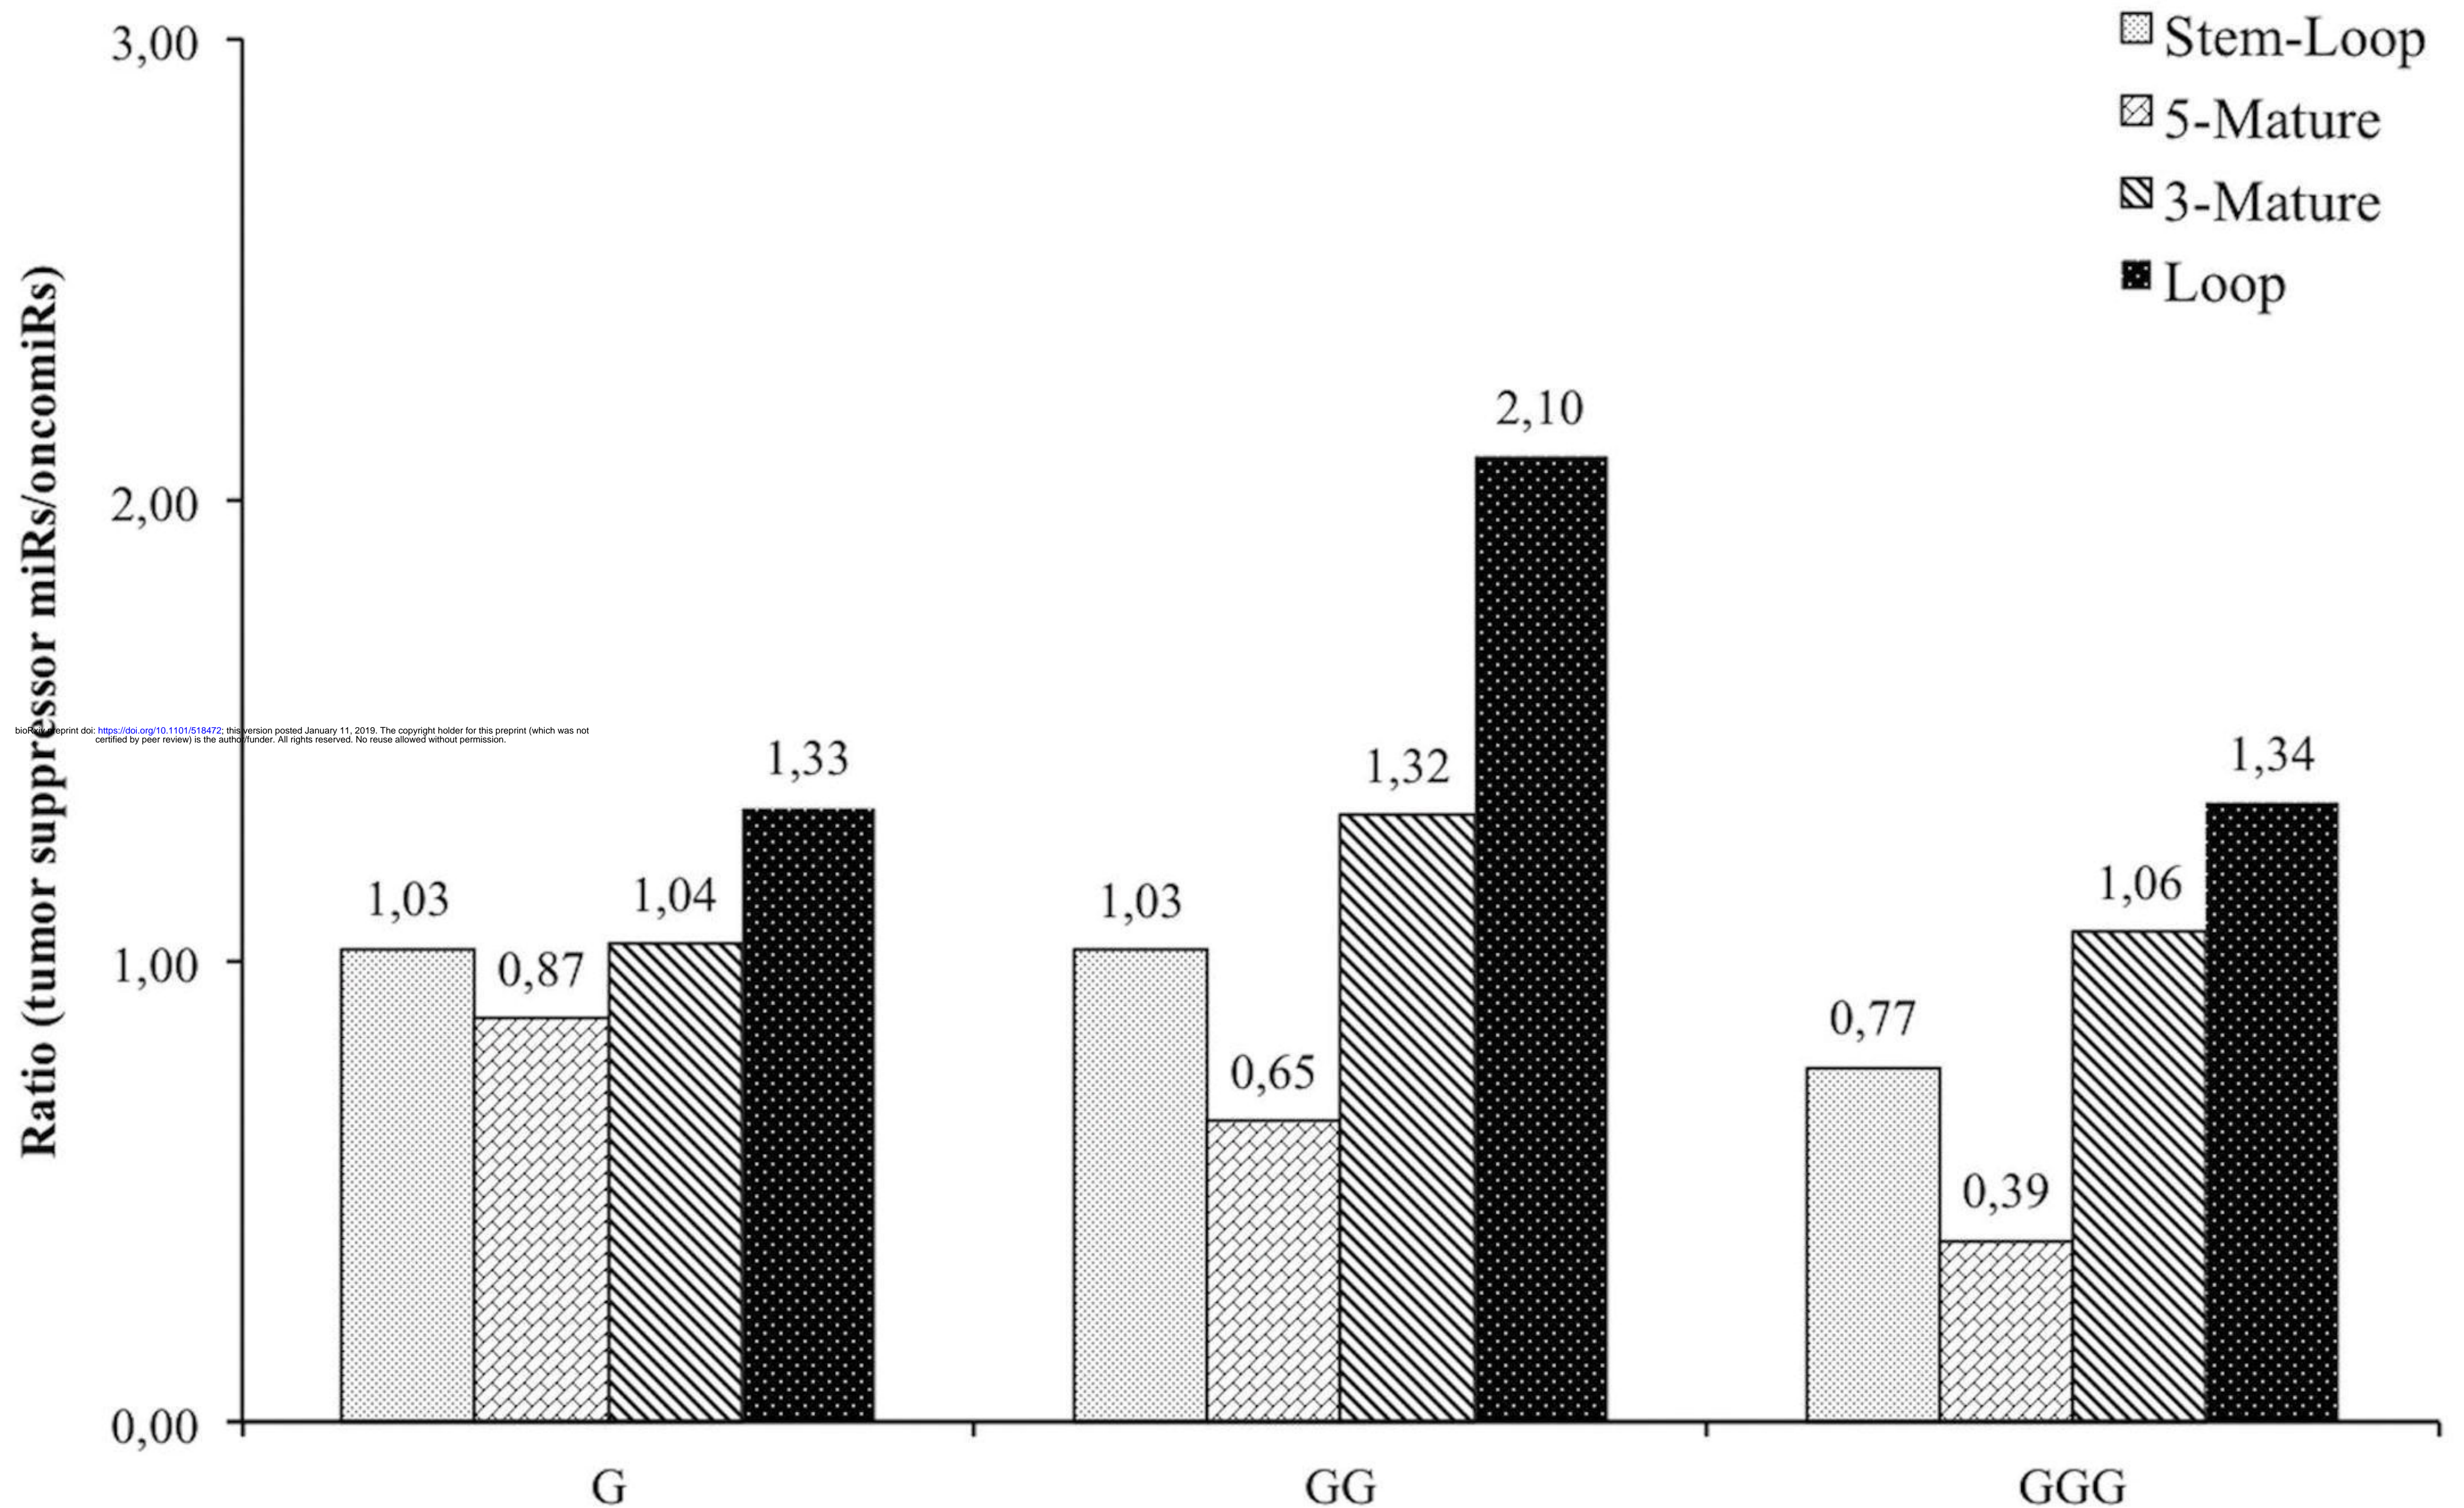



## Breast cancer

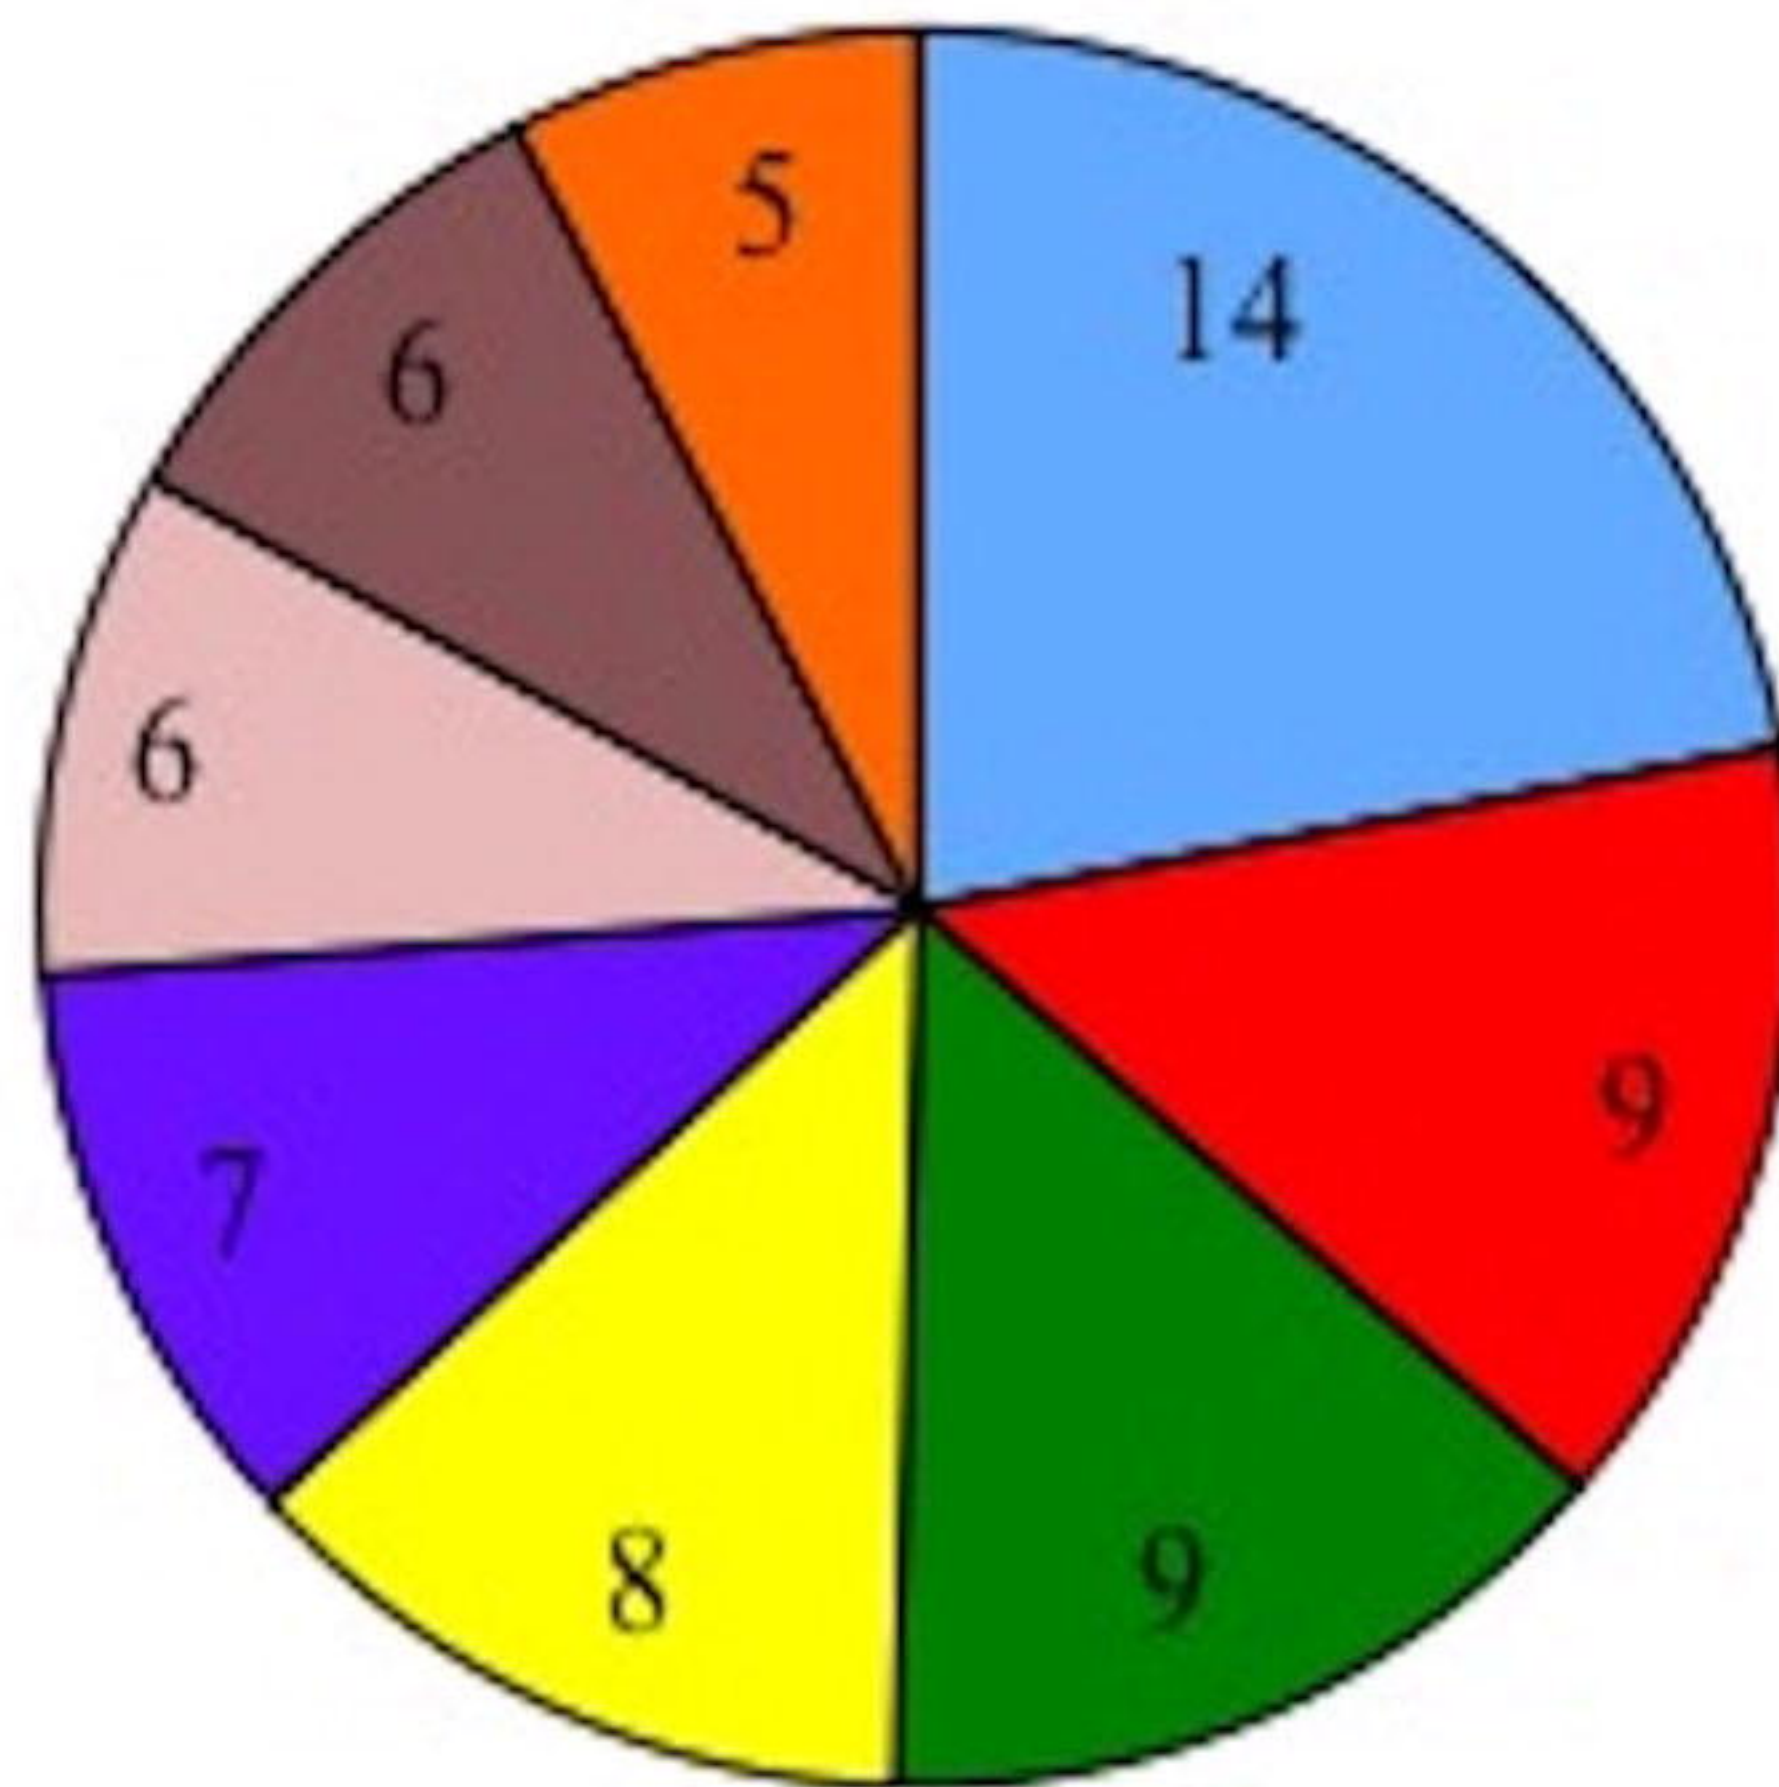

- Negative regulation of cell death
- Regulation of signal transduction
- Immune system development
- Positive regulation of cell migration
- Reproductive structure development
- Regulation of angiogenesis
- Mesenchyme development
- Response to steroid hormone

## Lung cancer

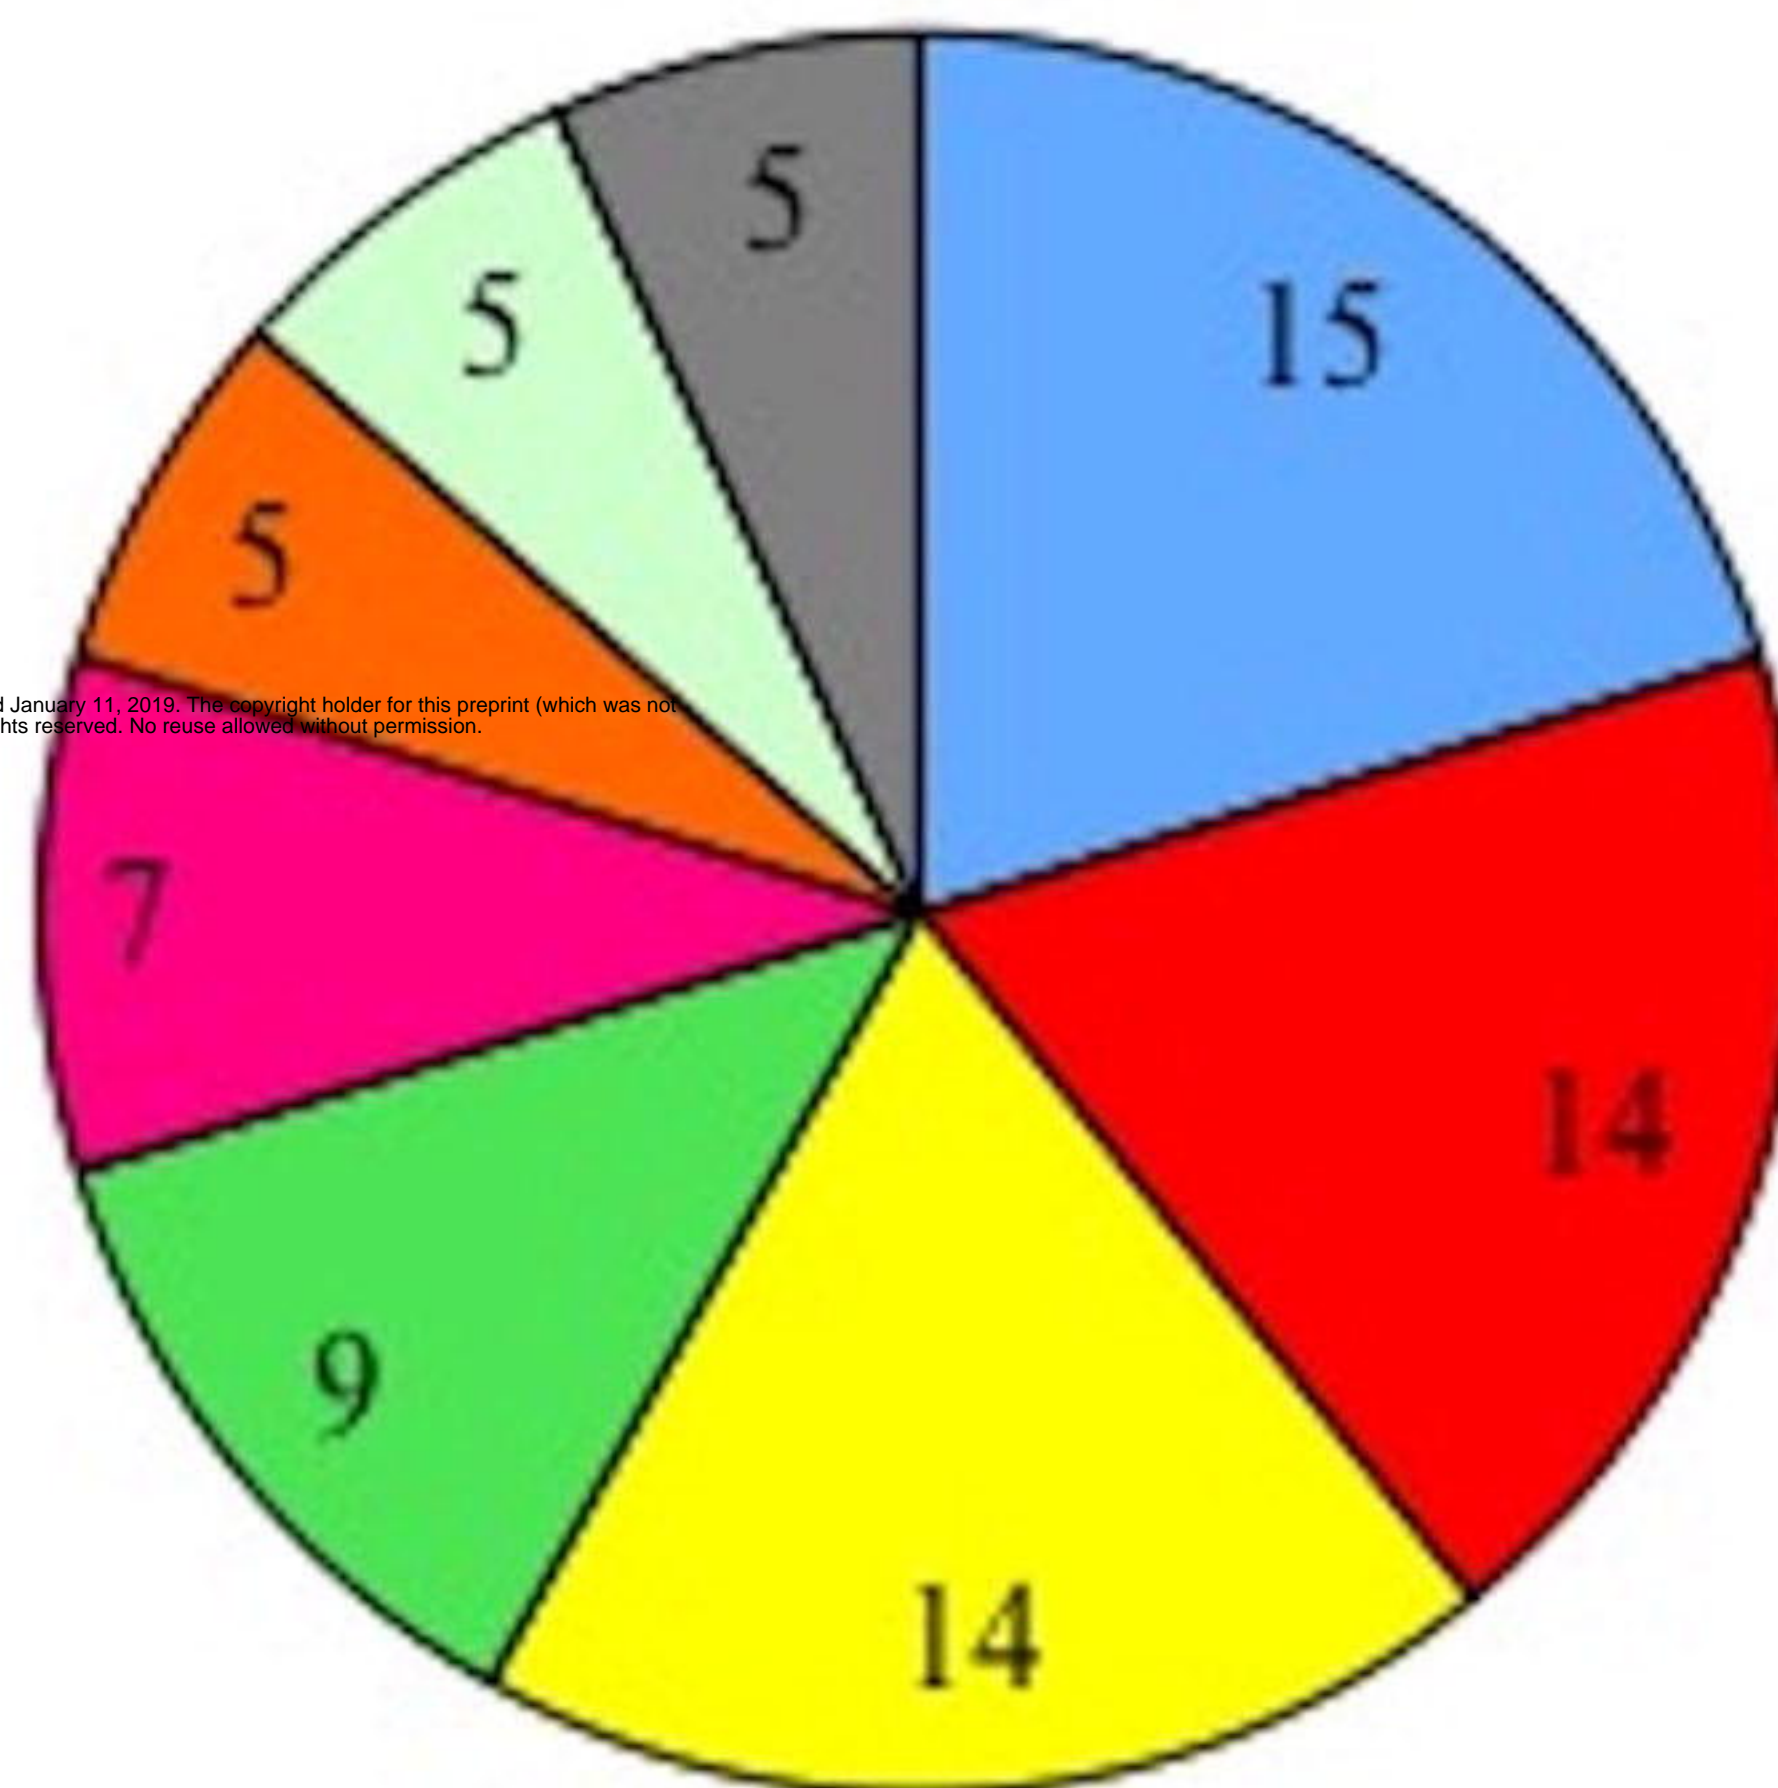

- Positive regulation of smooth muscle proliferation
- Respiratory system development
- Regulation of mitotic cell cycle
- Regulation of DNA repair
